# Supplementary material for: Effect of Sr Deficiency on Electrical Conductivity of Yb-Doped Strontium Zirconate
Source: MDPI journal article supplement (doi:10.3390/ma15124126), 2022-06-10
Supplement: s1 [file s1]

## Supplementary Data

### Effect of Sr deficiency on electrical conductivity of Yb-doped strontium zirconate

Adelya Khaliullina<sup>1</sup>, Anastasia Meshcherskikh<sup>1</sup>, Aleksander Pankratov<sup>1</sup> and Liliya Dunyushkina<sup>1,\*</sup>

<sup>1</sup> Institute of High Temperature Electrochemistry, 20 Akademicheskaya St, 620990 Ekaterinburg, Russia; ade-lia01@mail.ru (A.K.); lazyty@mail.ru (A.M.); a.pankratov@ihte.uran.ru (A.P.)

\* Correspondence: lidung@list.ru; Tel.: +7(343)3623240

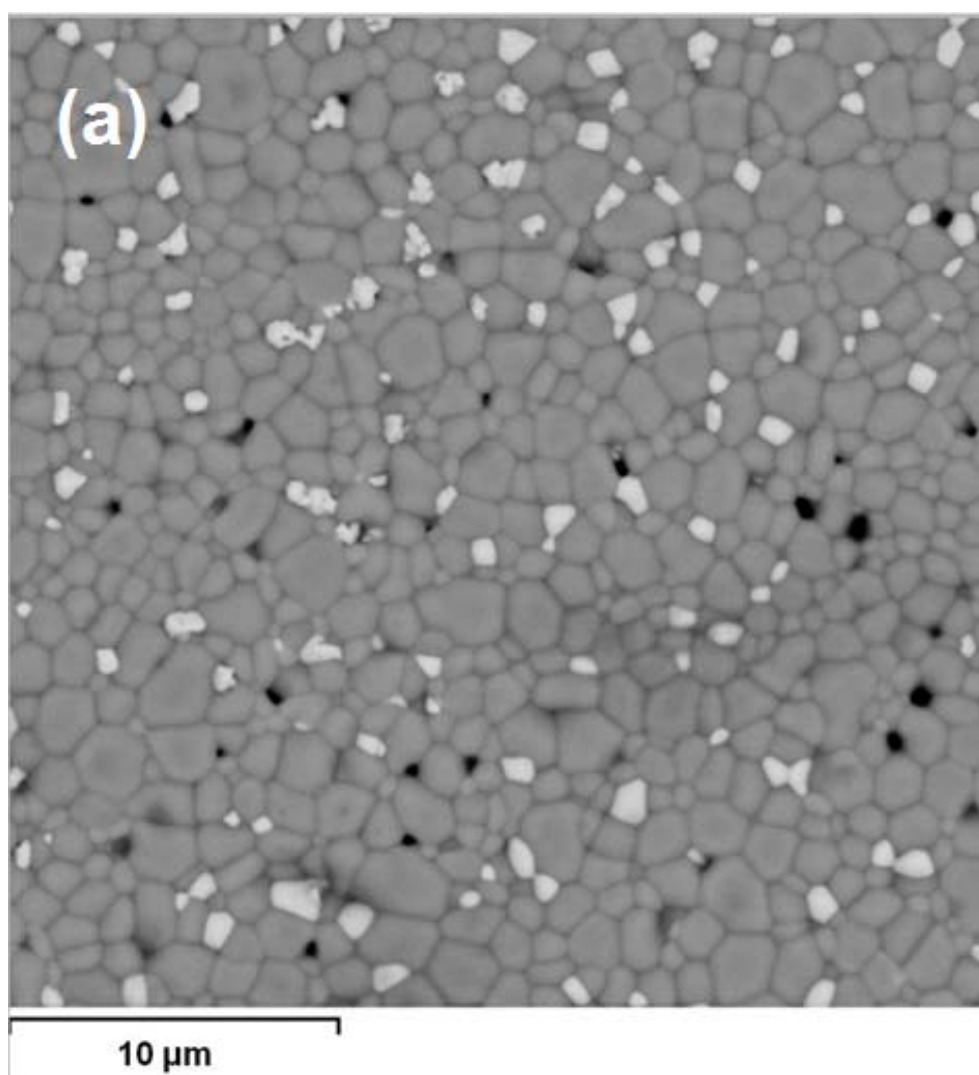

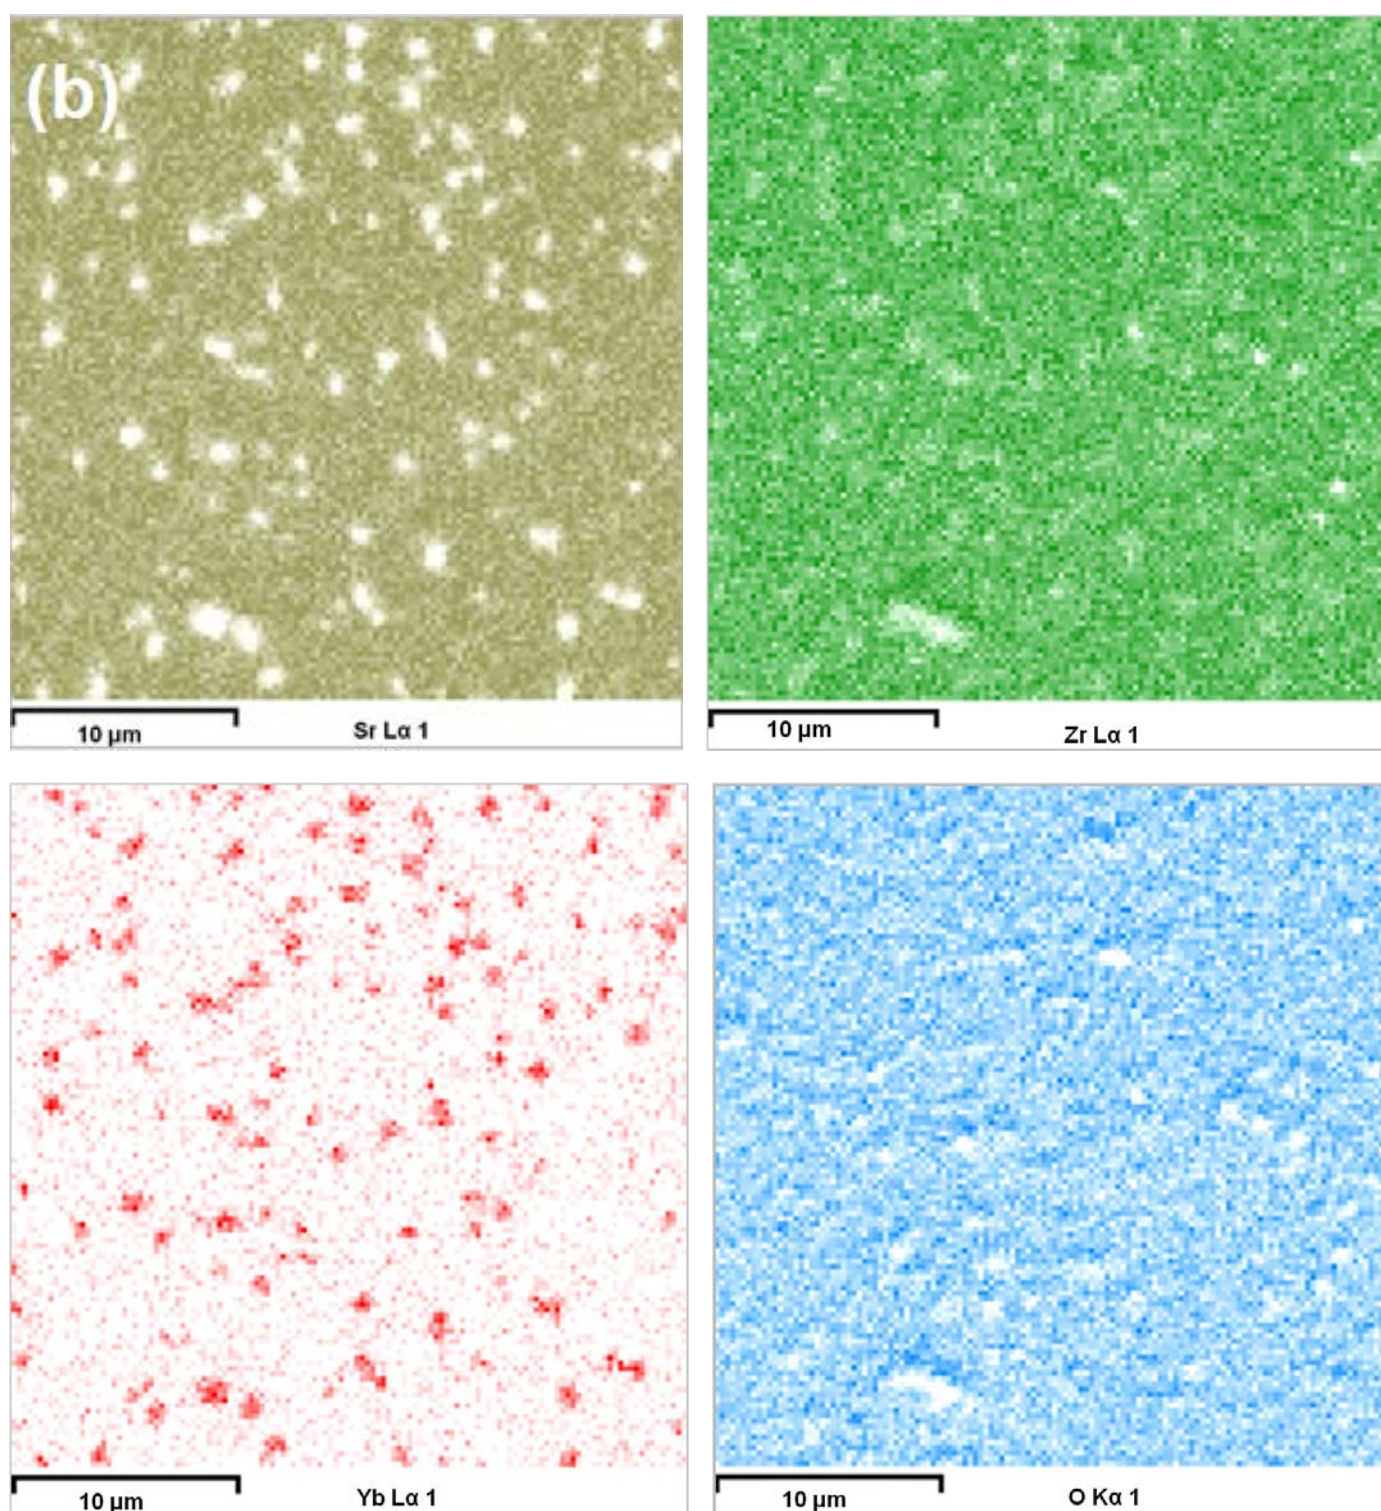

**Figure S1.** (a) Back scattered electron image of  $x = 0.94$  sample and (b) corresponding EDX mapping images of Sr, Zr, Yb and O.

**Table S1.** Elemental composition (at.%) of the surface of of  $x = 0.94$  sample after polishing and thermal etching (1400 °C, 4 h) from EDX data

| Point                                            | O     | Sr    | Zr    | Yb    |
|--------------------------------------------------|-------|-------|-------|-------|
| 1                                                | 61.83 | 18.54 | 18.86 | 0.77  |
| 2                                                | 57.66 | 20.70 | 20.86 | 0.78  |
| 3                                                | 57.90 | 20.49 | 20.73 | 0.88  |
| 4                                                | 56.58 | 20.93 | 21.14 | 0.72  |
| 5                                                | 57.21 | 20.71 | 21.05 | 0.81  |
| 6                                                | 56.62 | 21.21 | 21.39 | 0.78  |
| Average values for points 1–6 (main phase)       |       |       |       |       |
|                                                  | 58.00 | 20.43 | 20.67 | 0.79  |
| 7                                                | 59.57 | 8.94  | 18.09 | 13.39 |
| 8                                                | 62.21 | 4.68  | 17.56 | 15.54 |
| 9                                                | 57.23 | 4.33  | 20.14 | 18.30 |
| 10                                               | 58.67 | 7.78  | 18.38 | 15.16 |
| Average values for points 7–10 (secondary phase) |       |       |       |       |
|                                                  | 59.42 | 6.43  | 18.54 | 15.60 |

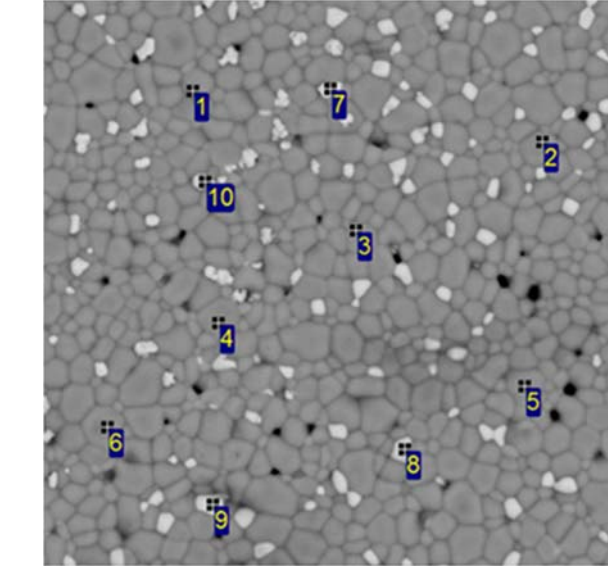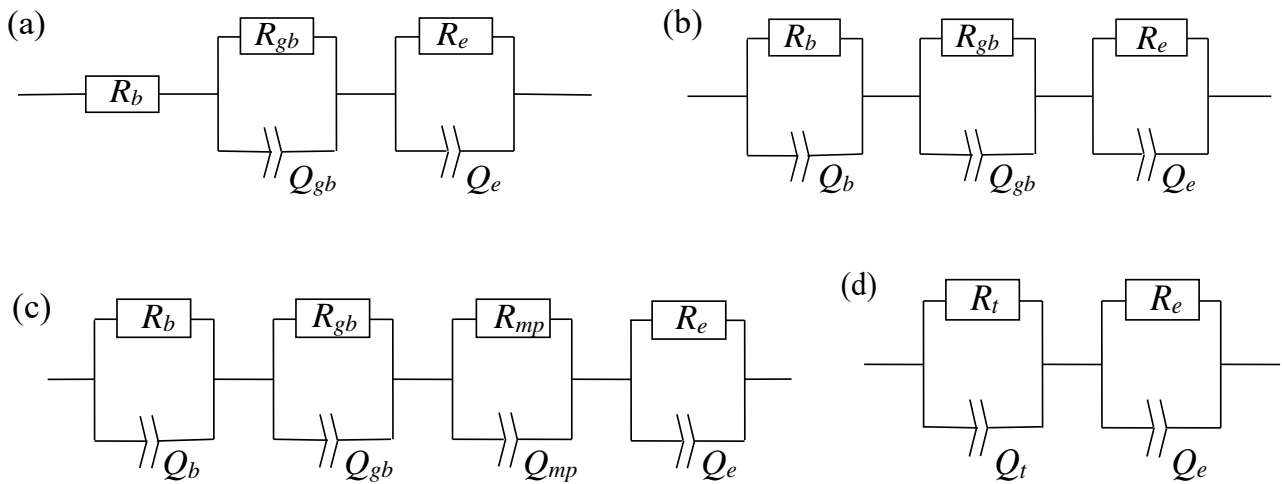

**Figure S2.** Equivalent circuits used for deconvolution of impedance spectra for: (a)  $x = 0.98$  and 1.00 at 550–800 °C; (b)  $x = 0.98$  and 1.00 at 500 °C and below; (c)  $x = 0.96$  at 350 °C and below; (d)  $x = 0.94$ .  $R_t$  denotes the total resistance of a sample;  $R_b$ ,  $R_{gb}$ ,  $R_{mp}$  and  $R_e$  are the grain interior, grain boundary, minor phase and electrode resistances, respectively;  $Q_b$ ,  $Q_{gb}$ ,  $Q_{mp}$  and  $Q_e$  are the constant phase element associated with the grain interior, grain boundary, minor phase and electrode responses;  $Q_t$  is the constant phase element related with the total response of a sample.



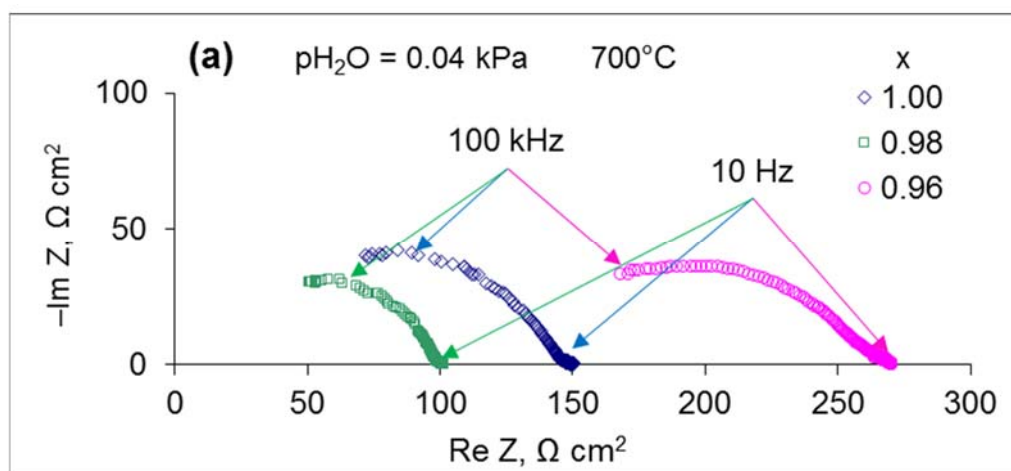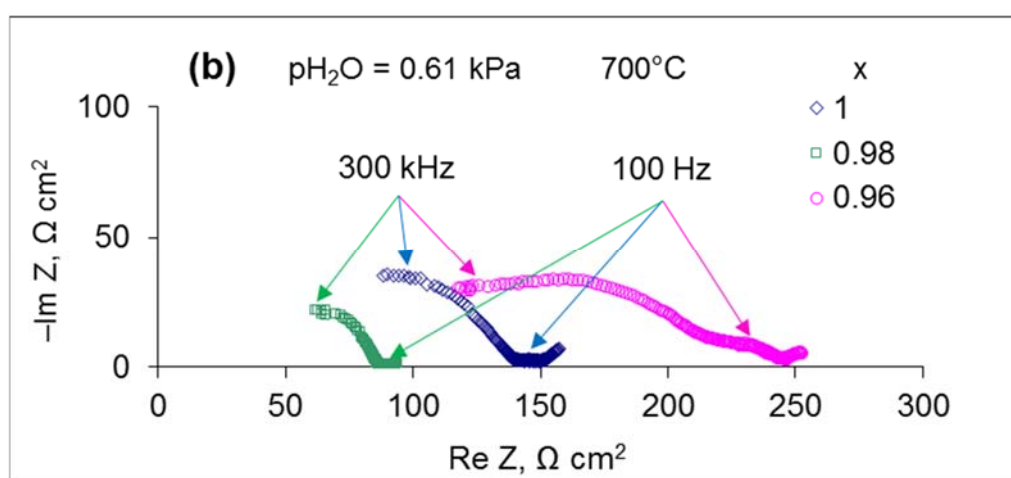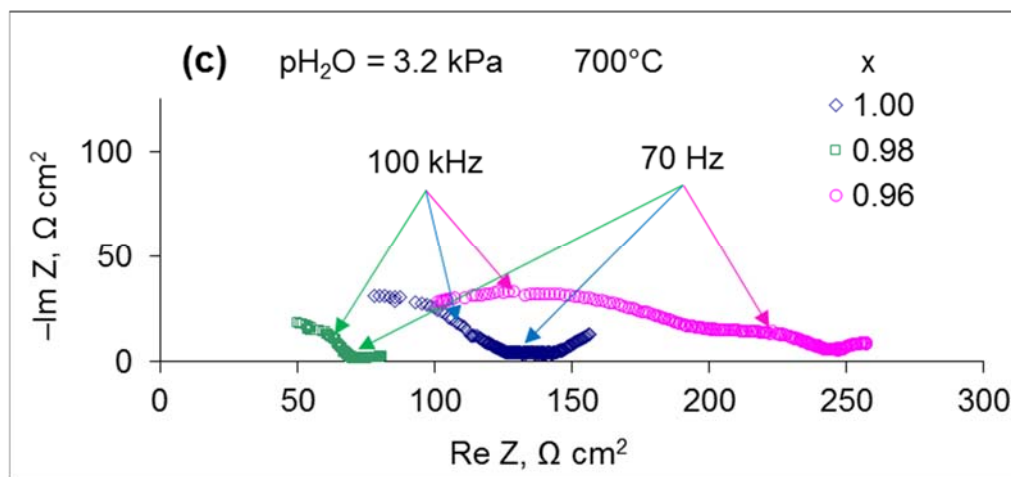

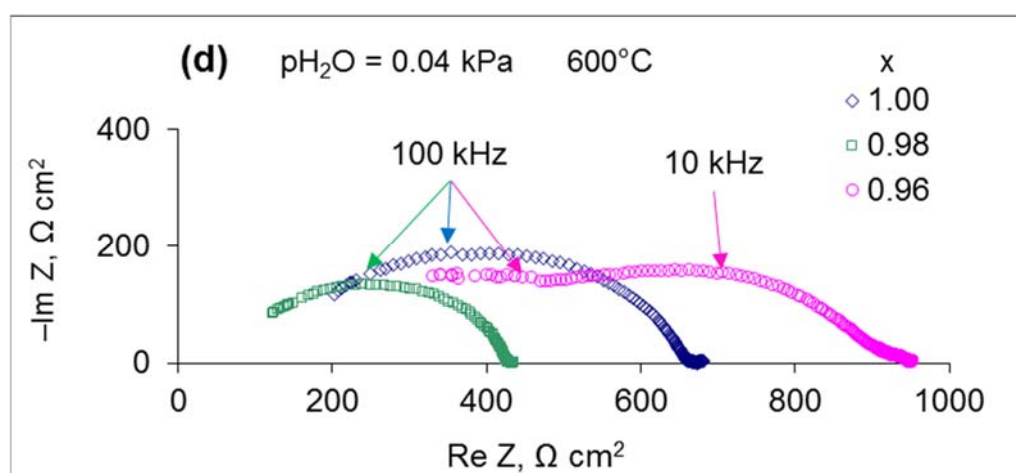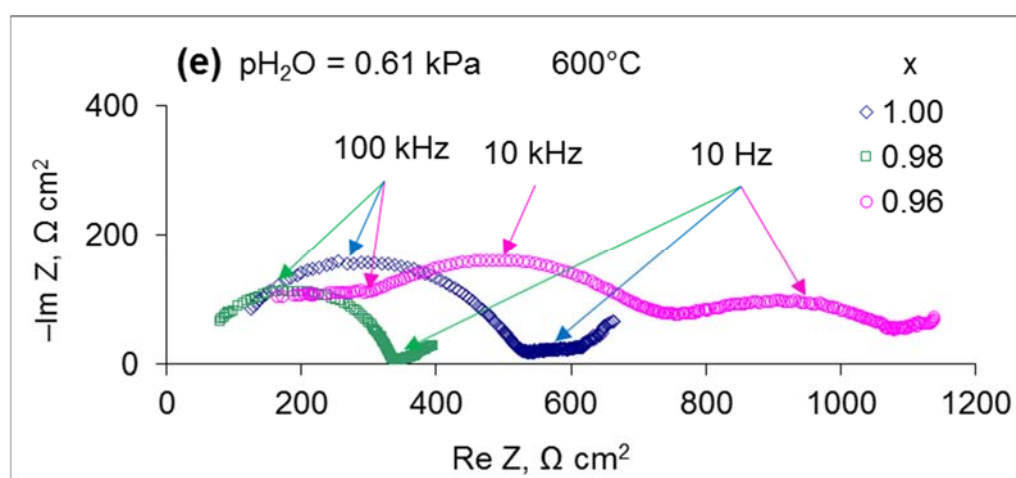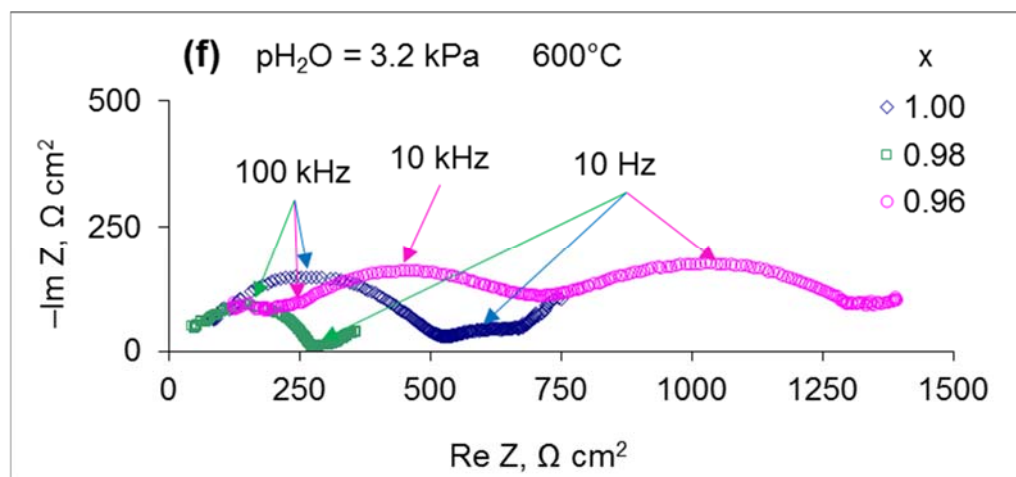

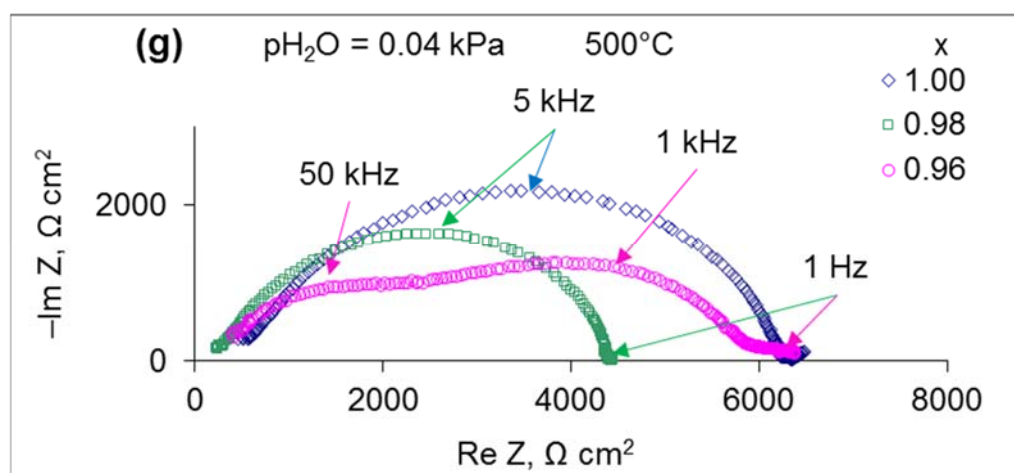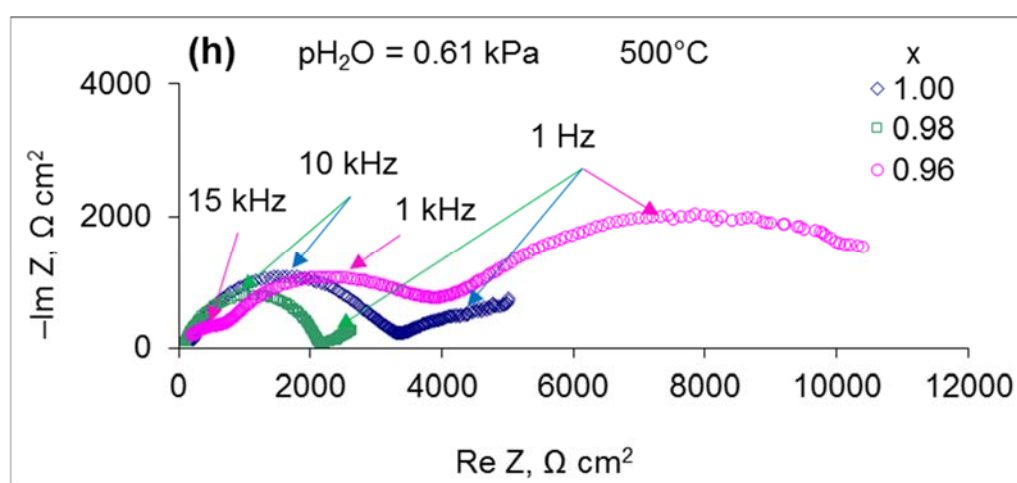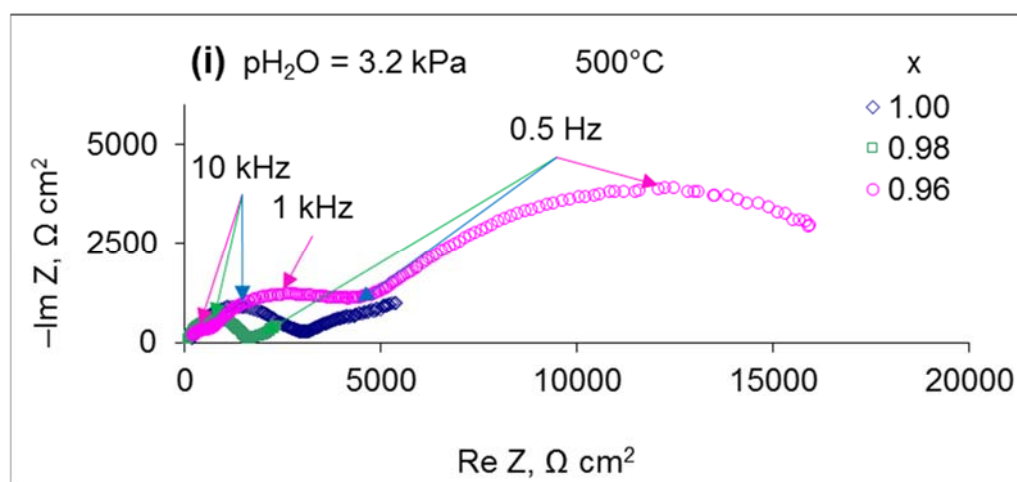

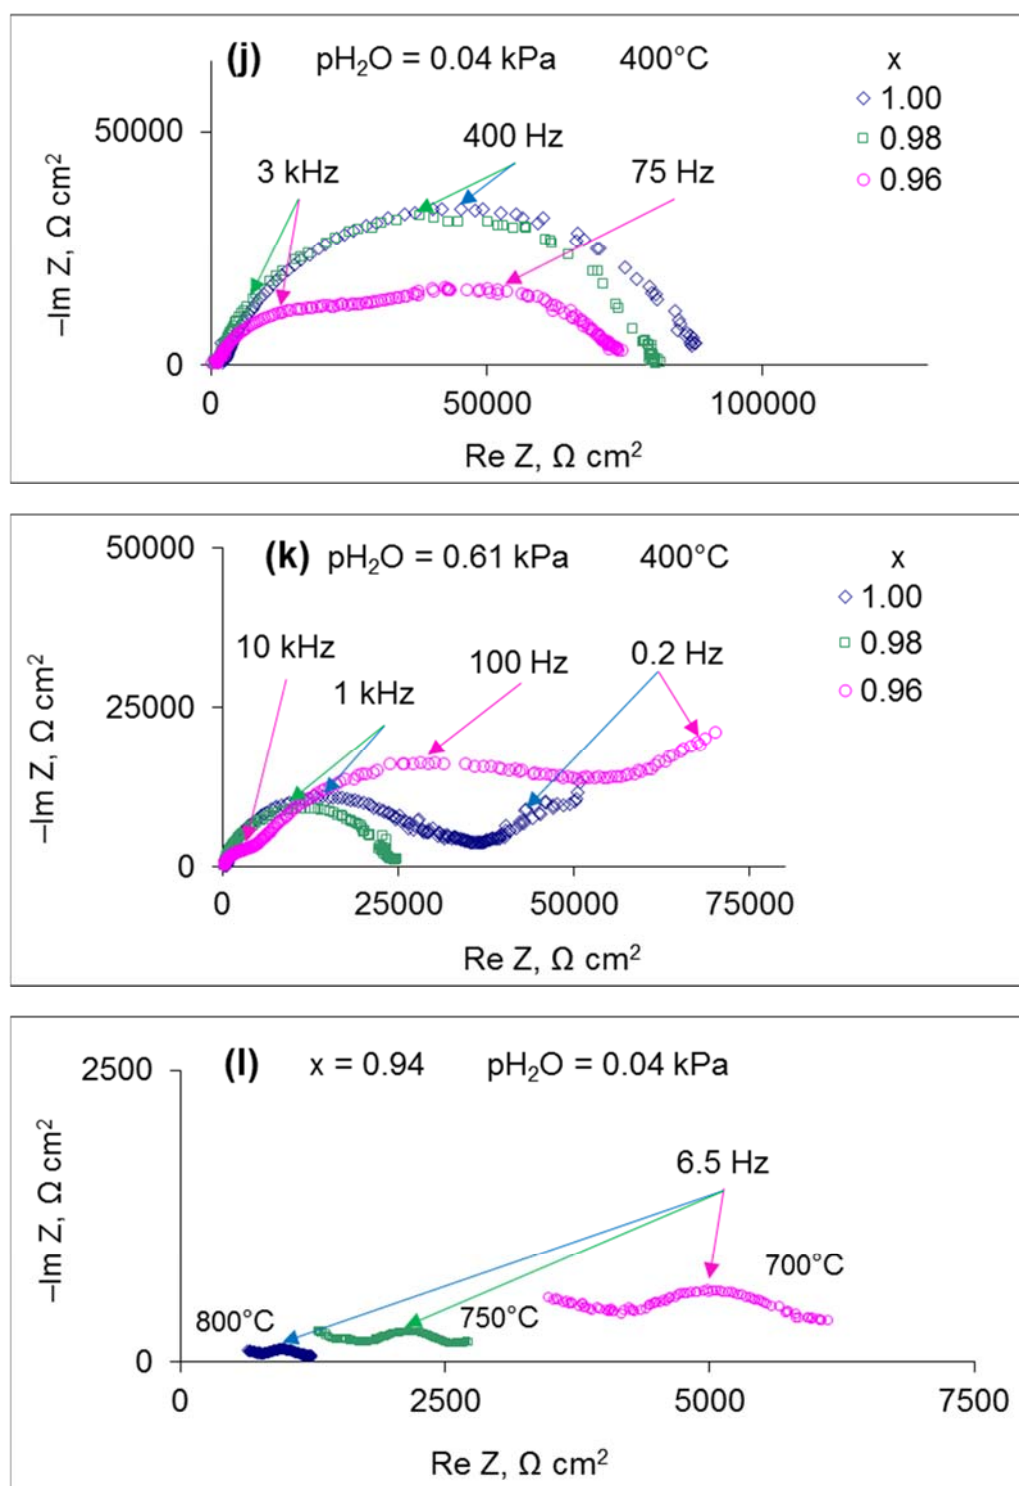

**Figure S3.** Impedance spectra of the samples with  $x = 0.96$ – $1.00$  measured in air at  $700^\circ\text{C}$  (a–c),  $600^\circ\text{C}$  (d–f),  $500^\circ\text{C}$  (g–i) and  $400^\circ\text{C}$  (j,k); at  $\text{pH}_2\text{O} = 0.04 \text{ kPa}$  (a,d,g,j),  $0.61 \text{ kPa}$  (b,e,h,k) and  $3.2 \text{ kPa}$  (c,f,i); and the spectra of the  $x = 0.94$  sample at  $\text{pH}_2\text{O} = 0.04 \text{ kPa}$  (l).
